# Supplementary material
Source: bioRxiv or medRxiv preprint supplement (https://www.medrxiv.org/highwire/filestream/81083/field_highwire_adjunct_files/0/2020.05.13.20101139-1.pdf)
Supplement: Supplementary file [file 2020.05.13.20101139-1.pdf]

Triaging of Respiratory Protective Equipment on the assumed risk of SARS-CoV-2 aerosol exposure in patient-facing healthcare workers delivering secondary care: a rapid review

P Ramaraj, JT Super, R Doyle, C Aylwin, S Hettiaratchy. 2020.

Appendices

Appendix 1 – HMG’s PPE Guidance as at 17<sup>th</sup> April 2020

**Public Health England**

## COVID-19 Safe ways of working

# A visual guide to safe PPE

| General contact with confirmed or possible COVID-19 cases | Aerosol Generating Procedures or High Risk Areas |
|-----------------------------------------------------------|--------------------------------------------------|
| Eye protection to be worn on risk assessment              | Eye protection eye shield, goggles or visor      |
| Fluid resistant surgical mask                             | Filtering facepiece respirator                   |
| Disposable apron                                          | Long sleeved fluid repellent gown                |
| Gloves                                                    | Gloves                                           |

Clean your hands before and after patient contact and after removing some or all of your PPE

Clean all the equipment that you are using according to local policies

Use the appropriate PPE for the situation you are working in (General / AGPs or High Risk Areas)

Take off your PPE safely

Take breaks and hydrate yourself regularly

For more information on infection prevention and control of COVID-19 please visit:  
[www.gov.uk/government/publications/wuhan-novel-coronavirus-infection-prevention-and-control](http://www.gov.uk/government/publications/wuhan-novel-coronavirus-infection-prevention-and-control)

© Crown copyright 2020. Public Health England Gateway Number 2010206. Version 1 April 2 2020.

**Appendix 2 – An explanation of international nomenclature and testing standards surrounding respirators and surgical facemasks**

|                              |                                                                                                                                                                                                                                                                                                                                                                                                          |                                                                                                                                                                                                                                                                                                                 |                                                                                                               |         |          |
|------------------------------|----------------------------------------------------------------------------------------------------------------------------------------------------------------------------------------------------------------------------------------------------------------------------------------------------------------------------------------------------------------------------------------------------------|-----------------------------------------------------------------------------------------------------------------------------------------------------------------------------------------------------------------------------------------------------------------------------------------------------------------|---------------------------------------------------------------------------------------------------------------|---------|----------|
| Key Features                 |                                                                                                                                                                                                                                                                                                                        |                                                                                                                                                                                                                                                                                                                 |                                                                                                               |         |          |
|                              | <ul style="list-style-type: none"> <li>(1) Dense polymer material (usually melt blown polypropylene) with sub-micron pores</li> <li>(2) Moulded, countered shaping or metal nose clip for close fit with face</li> <li>(3) Polymer lip creating airtight seal with skin</li> <li>(4) Exhaust valve (optional) to reduce exhalation pressure</li> <li>(5) Adjustable straps for close face fit</li> </ul> | <ul style="list-style-type: none"> <li>(1) Dense polymer material (usually melt blown polypropylene) with micron sized pores</li> <li>(2) Pleated, expandable form for loose coverage of all face shapes</li> <li>(3) Non-adjustable elastic straps/ fabric straps for user to tie to desired length</li> </ul> |                                                                                                               |         |          |
| Relevant European standards  | EN 149:2001                                                                                                                                                                                                                                                                                                                                                                                              |                                                                                                                                                                                                                                                                                                                 | EN 14683:2019, ISO 22609:2004, ISO 10993                                                                      |         |          |
| Specific models <sup>+</sup> | European                                                                                                                                                                                                                                                                                                                                                                                                 | FFP1, FFP2, FFP3                                                                                                                                                                                                                                                                                                | Type I                                                                                                        | Type II | Type IIR |
|                              | USA                                                                                                                                                                                                                                                                                                                                                                                                      | N95, N99, N100                                                                                                                                                                                                                                                                                                  | Level 1                                                                                                       | Level 2 | Level 3  |
| Aerosol leakage              | Requires seal with skin and a total inward leakage of air of <5%                                                                                                                                                                                                                                                                                                                                         |                                                                                                                                                                                                                                                                                                                 | No seal with skin and protection against leakage                                                              |         |          |
| Particle filter efficiency*  | 99% of 0.6 um mean diameter particles <b>to wearer</b>                                                                                                                                                                                                                                                                                                                                                   |                                                                                                                                                                                                                                                                                                                 | 98% of 3 um mean diameter particles <b>through filter material.</b><br><b>No testing for wearer exposure.</b> |         |          |

<sup>+</sup>Highlighted are most relevant for this review as the models supplied by the NHS for HCW protection

\*Efforts have been made to harmonize difference test methods to compare filter efficiency

### **Appendix 3 – PICO Strategy and PubMed/MEDLINE Search Strand**

Population: patient-facing healthcare workers in secondary inpatient care.

Intervention: surgical masks (including international nomenclature: medical mask, fluid-repellent surgical mask).

Comparison: respirators (defined as FFP3, FFP2, FFP1, N95, N99 or N100 to include international nomenclature during a global crisis and variation of legal testing standards internationally).

Outcomes: SARS-CoV-2 protection (this ensured a broad outcome in terms of parameters used to define “protection” but maintained a SARS-CoV-2 specific search).

PubMed search strand:

*("respirator" AND/OR "surgical mask" AND/OR mask AND/OR FFP\* AND/OR "FFP3" AND/OR PPE AND/OR "personal protective equipment") AND ("viral" AND/OR "infection" AND/OR "respiratory" AND/OR "COVID" AND/OR "COVID-19" AND/OR "coronavirus" AND/OR "SARS-CoV-2")*
